# Supplementary material for: Enhanced piezotronics by single-crystalline ferroelectrics for uniformly strengthening the piezo-photocatalysis of electrospun BaTiO3@TiO2 nanofibers
Source: Royal Society of Chemistry journal article supplement (doi:10.1039/d2nr03828e), 2022-01-01
Supplement: d2nr03828e1.pdf [file d2nr03828e1.pdf]

## Electronic supplementary information (ESI)

### Enhanced piezotronics by single-crystalline ferroelectrics for uniformly strengthening the piezo-photocatalysis of electrospun BaTiO<sub>3</sub>@TiO<sub>2</sub> nanofibers

Bi Fu <sup>a, b, c</sup>, Jianjie Li <sup>a</sup>, Huaide Jiang <sup>a</sup>, Xiaoli He <sup>a</sup>, Yanmei Ma <sup>a</sup>, Jingke Wang <sup>a</sup>,  
Chaoyang Shi <sup>\*d</sup> and Chengzhi Hu <sup>\*a, c</sup>

- <sup>a</sup> Shenzhen Key Laboratory of Biomimetic Robotics and Intelligent Systems, Department of Mechanical and Energy Engineering, Southern University of Science and Technology, Shenzhen, 518055, China.
- <sup>b</sup> School of Optoelectronic Engineering, Guangdong Polytechnic Normal University, Guangzhou 510665, China.
- <sup>c</sup> Guangdong Provincial Key Laboratory of Human-Augmentation and Rehabilitation Robotics in Universities, Southern University of Science and Technology, Shenzhen, 518055, China.
- <sup>d</sup> Key Laboratory of Mechanism Theory and Equipment Design of Ministry of Education, School of Mechanical Engineering, Tianjin University, Tianjin, 300072, China.

---

\*Corresponding author. E-mail: hucz@sustech.edu.cn (C. Hu); chaoyang.shi@tju.edu.cn (C. Shi).

**TGA analysis of BaTiO<sub>3</sub>/TiO<sub>2</sub>/PVP nanofibers.** Fig. S1 shows the TGA curve of BaTiO<sub>3</sub>/TiO<sub>2</sub>/PVP precursor nanofibers that are annealed in the air with temperatures ranging from 50 to 800 °C. The weight of the precursor nanofibers steadily decreases with the increase of temperature. The minor mass loss between 50-300 °C is due to the removal of solvents. The second endothermic peak accompanied by the mass loss about 65% between 300-400 °C is attributed to the decomposition of PVP and butyl titanate. The mass loss in the temperature range of 400-500 °C is related to the decomposition of organic groups. About 92% mass loss is observed around 500 °C. There is no mass loss above 500 °C, which indicates the crystallization temperature. Thus, a temperature above 500 °C is used to anneal the BaTiO<sub>3</sub>/TiO<sub>2</sub>/PVP precursor nanofibers to ensure crystallization.

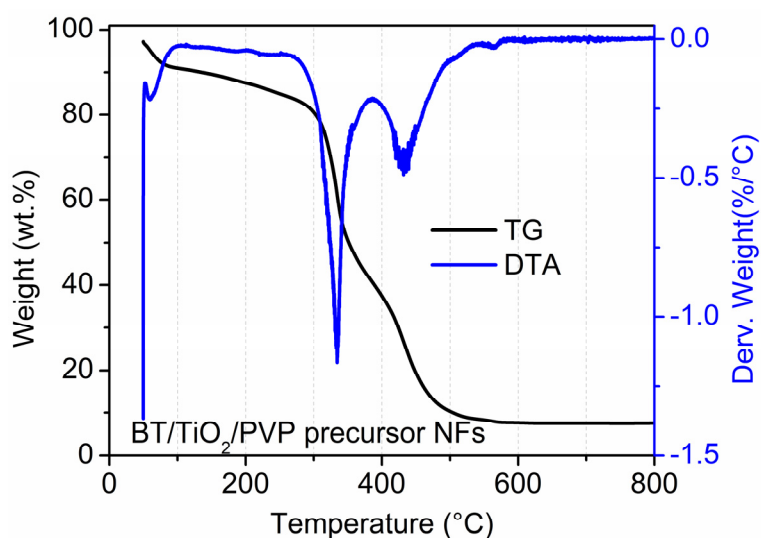

**Figure S1.** TGA curves of BaTiO<sub>3</sub>/TiO<sub>2</sub>/PVP precursor nanofibers at temperatures ranging from 50 to 800 °C.

TiO<sub>2</sub> nanofibers are fabricated by a sol-gel assisted electrospinning followed by annealing. First, 0.65 g tetrabutyl titanium is dissolved into 8 mL ethanol, then 3.0 g PVP is added to increase its viscosity. The obtained 0.2 M TiO<sub>2</sub> precursor solution is loaded into a 10 mL plastic syringe with a G-21 stainless-steel needle. The feeding rate is controlled at 0.3 mL h<sup>-1</sup> by a syringe pump. The distance between the needle tip and the ground collector is fixed at 12 cm. The relative humidity is kept within 30% at room temperature. Under a high voltage of 14 kV, TiO<sub>2</sub>/PVP precursor nanofibers are collected by an aluminum foil for 5 h. The as-spun precursor nanofibers are dried at 120 °C overnight. Finally, TiO<sub>2</sub> nanofibers are obtained by sintering the dried precursor nanofibers at 500 °C for 2 h at the heating and cooling rates of 2 °C min<sup>-1</sup>.

Fig. S2 shows the SEM image of TiO<sub>2</sub> nanofibers with a diameter of approximately 250 nm. The TEM image in Fig. S2(b) reveals that the TiO<sub>2</sub> nanofiber is composed of nanocrystals with an average size of 5 nm. Fig. S2(c) shows the HR-TEM image obtained from the white box in Fig. S2(b). The interplanar crystal spacing of 2.4 Å is ascribed to the (004) crystallographic plane of TiO<sub>2</sub>. The full (Fig. S2(d)) and electron (Fig. S2(e)) mapping images of single TiO<sub>2</sub> nanofiber is composed of the individual Ti (Fig. S2(f)) and O (Fig. S2(g)) element mappings. All element mappings exhibit a one-dimensional fibric outline that confirms the successful synthesis of TiO<sub>2</sub> nanofibers.

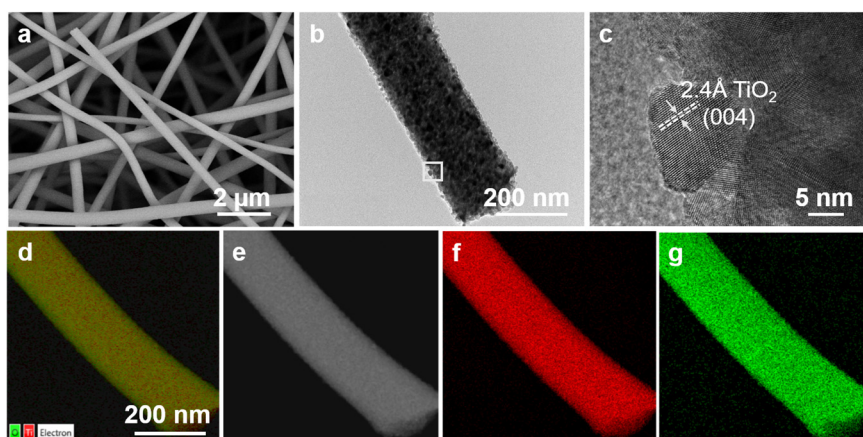

**Figure S2. Morphology and microstructure of TiO<sub>2</sub> nanofibers.** (a) SEM, (b) TEM, and (c) HR-TEM, (d) full, (e) electron, (f) Ti, and (g) O element mapping images of TiO<sub>2</sub> nanofibers.

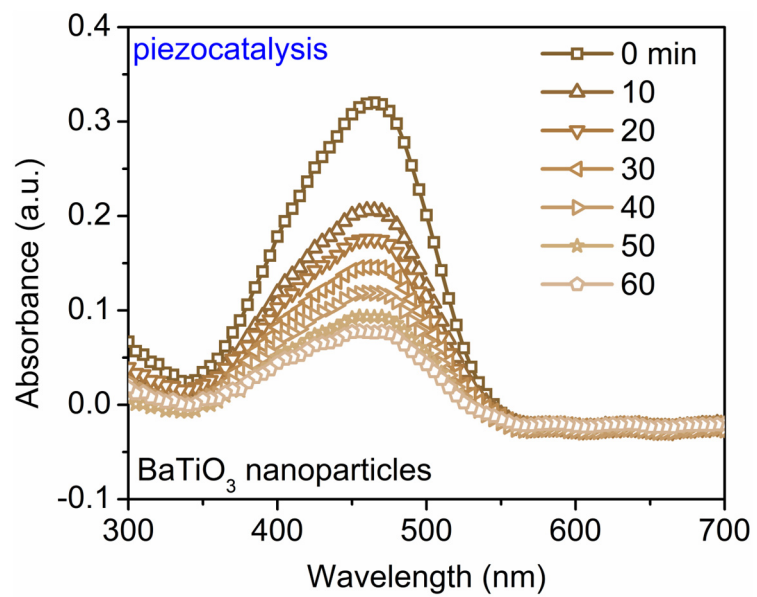

**Figure S3.** The UV-vis absorption spectra of BaTiO<sub>3</sub> nanoparticles under ultrasound irradiation.

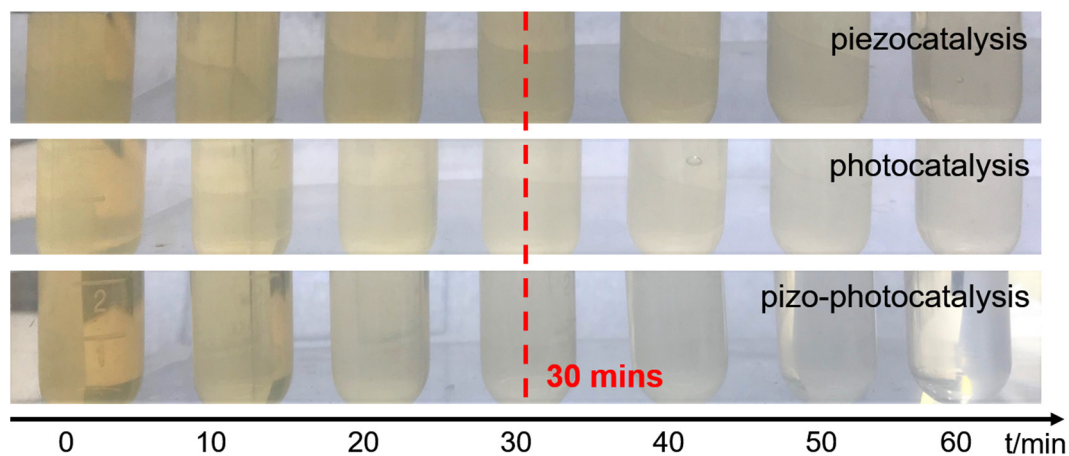

**Figure S4.** The photograph of the piezocatalytic, photocatalytic, and piezo-photocatalytic degradation of MO in water by  $\text{BaTiO}_3@\text{TiO}_2$  hybrid nanofibers under ultrasound, UV light irradiation, and both ultrasound and UV light irradiation, respectively.

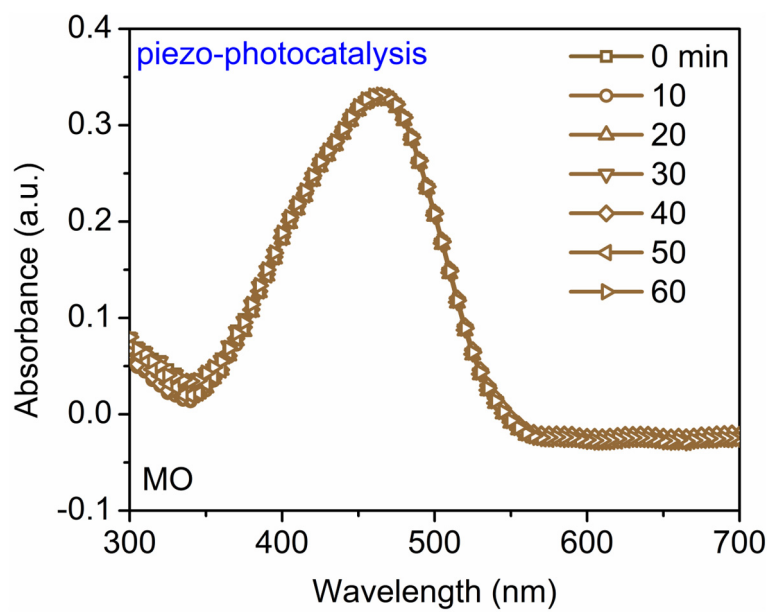

**Figure S5.** The UV-vis absorption spectra of the degradation of MO in water without catalysts under both ultrasound and UV light irradiation.

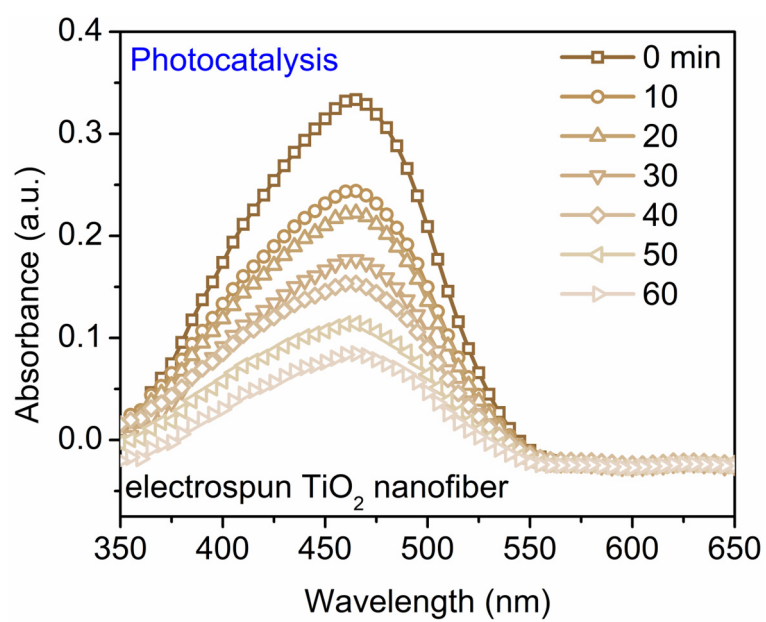

**Figure S6.** UV-vis absorption spectra of photocatalytic degradation of MO in water by TiO<sub>2</sub> nanofibers under the UV light irradiation.

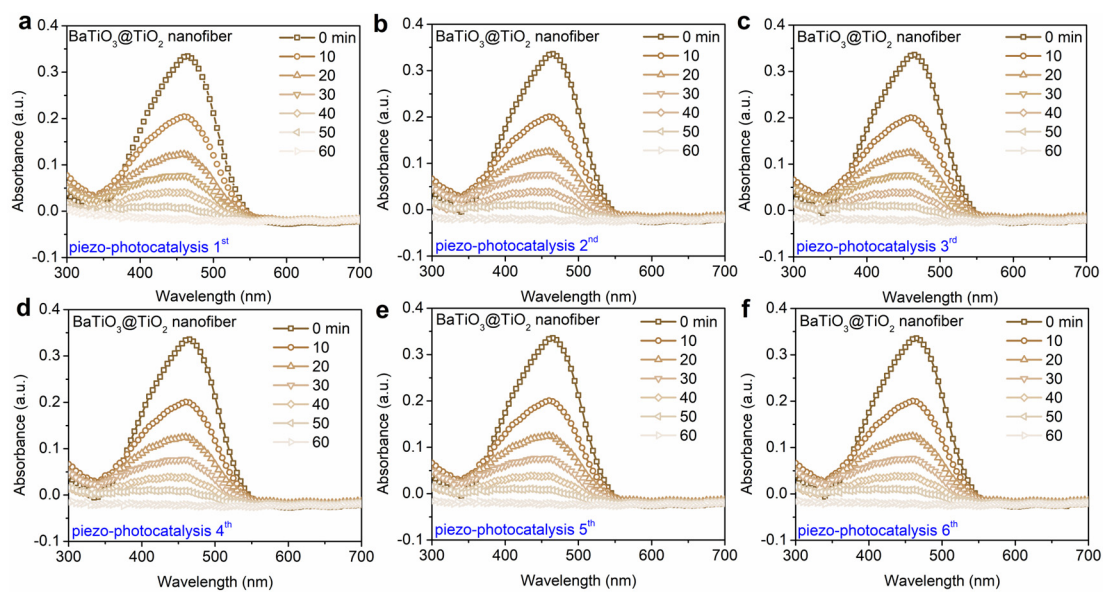

**Figure S7.** (a-f) UV-vis absorption spectra of the piezo-photocatalytic degradation of MO in water by BaTiO<sub>3</sub>@TiO<sub>2</sub> hybrid nanofibers under both ultrasound and UV light irradiation in 6 cycles, respectively.
